# Supplementary material for: The Big Pet Diabetes Survey: Perceived Frequency and Triggers for Euthanasia
Source: MDPI journal article supplement (doi:10.3390/vetsci4020027), 2017-05-14
Supplement: s1 [file s1]

## Supplement 2: Results of univariate analysis for the main treatment decision questions (D/C 1-4)

Table S1. Univariate analysis of euthanasia related questions. Grey shading indicates statistical significance.

D1/C1: "Typically, in this practice, out of 10 dogs/cats newly diagnosed with diabetes mellitus, how many are

euthanased on request of the owner at time of diagnosis?"

D2/C2: "Typically, in this practice, out of 10 dogs/cats newly diagnosed with diabetes mellitus, how many are

euthanased on request of the owner because of not wanting to treat with insulin injections at time of diagnosis?"

| Variable          | Group (n=number of respondents) | Median [IQR] |            |            |           | P-value <sup>a</sup> |        |        |        |
|-------------------|---------------------------------|--------------|------------|------------|-----------|----------------------|--------|--------|--------|
|                   |                                 | D 1          | D 2        | C 1        | C 2       | D 1                  | D 2    | C 1    | C 2    |
| Country           | UK & Ireland (n=168)            | 1 [0-1]      | 0 [0-1]    | 1 [0-1]    | 1 [0-1]   | <0.001               | 0.001  | <0.001 | <0.001 |
|                   | USA (n=790)                     | 1 [0-1]      | 0 [0-1]    | 1 [0-1]    | 1 [0-1]   |                      |        |        |        |
|                   | Canada (n=92)                   | 1 [1-2]      | 1 [0-1.75] | 1 [1-2]    | 1 [0-2]   |                      |        |        |        |
|                   | Australia (n=27)                | 1 [1-2]      | 1 [0-2]    | 1 [0.5-2]  | 1 [0-2]   |                      |        |        |        |
|                   | Cont. Europe (n=90)             | 1 [0-2]      | 0 [0-1]    | 1 [0-2]    | 1 [0-1]   |                      |        |        |        |
| Practice location | Rural (n=156)                   | 1 [0-2]      | 1 [0-2]    | 1 [0-2]    | 1 [0-2]   | <0.001               | <0.001 | <0.001 | <0.001 |
|                   | Urban (n=363)                   | 1 [0-1]      | 0 [0-1]    | 1 [0-2]    | 1 [0-1]   |                      |        |        |        |
|                   | Suburban (n=637)                | 1 [0-1]      | 0 [0-1]    | 1 [0-1]    | 0 [0-1]   |                      |        |        |        |
| Practice type I   | Mixed (n=114)                   | 1 [0-2]      | 1 [0-1]    | 1 [0.25-2] | 1 [0-2]   | <0.001               | 0.002  | <0.001 | 0.041  |
|                   | SA (n=1022)                     | 1 [0-1]      | 0 [0-1]    | 1 [0-1]    | 1 [0-1]   |                      |        |        |        |
| Practice type II  | Referral/Uni (n=79)             | 1 [0-1]      | 0 [0-1]    | 1 [0-1]    | 0 [0-1]   | 0.214                | 0.412  | 0.179  | 0.008  |
|                   | Charity (n=35)                  | 1 [0-2]      | 1 [0-1]    | 1 [0-2]    | 1 [0-1.5] |                      |        |        |        |
|                   | Private (n=1015)                | 1 [0-1]      | 0 [0-1]    | 1 [0-2]    | 1 [0-1]   |                      |        |        |        |
| % insured         | >20% insured (n=130)            | 1 [0-1]      | 0 [0-1]    | 1 [0-2]    | 0.5 [0-1] | 0.121                | 0.167  | 0.716  | 0.438  |
|                   | <20% insured (n=1042)           | 1 [0-1]      | 0 [0-1]    | 1 [0-2]    | 1 [0-1]   |                      |        |        |        |

IQR – interquartile range; Cont. Europe – Continental Europe; SA – 100% small animal practice; Uni – university hospital; <sup>a</sup> Kruskal-Wallis Test

**Table 2.** Percentages of 0/10 and 2/10 responses to euthanasia related questions D1/C1 and D2/C2.

| Variable          | Group (n=number respondents) | % 0 out of 10 / % 2 out of 10 |             |             |             |
|-------------------|------------------------------|-------------------------------|-------------|-------------|-------------|
|                   |                              | D 1                           | D 2         | C 1         | C 2         |
| Country           | UK & Ireland (n=168)         | 46.4 / 9.5                    | 57.1 / 8.9  | 39.0 / 20.1 | 47.9 / 10.3 |
|                   | USA (n=790)                  | 46.3 / 11.4                   | 56.0 / 6.7  | 38.7 / 13.4 | 48.9 / 8.0  |
|                   | Canada (n=92)                | 23.9 / 15.2                   | 37.0 / 12.0 | 15.1 / 28.0 | 30.1 / 19.4 |
|                   | Australia (n=27)             | 29.6 / 18.5                   | 48.1 / 14.8 | 24.1 / 31.0 | 44.8 / 20.7 |
|                   | Cont. Europe (n=90)          | 44.4 / 17.8                   | 56.7 / 7.8  | 40.9 / 14.0 | 47.8 / 10.9 |
| Practice location | Rural (n=156)                | 32.5 / 14.3                   | 37.4 / 13.5 | 25.2 / 20.0 | 32.7 / 15.4 |
|                   | Urban (n=363)                | 41.9 / 12.8                   | 54.6 / 7.8  | 36.9 / 17.9 | 47.7 / 10.7 |
|                   | Suburban (n=637)             | 48.6 / 11.0                   | 58.8 / 6.2  | 39.7 / 13.8 | 50.2 / 8.0  |
| Practice type I   | Mixed (n=114)                | 30.8 / 12.8                   | 42.2 / 12.1 | 25.0 / 21.6 | 39.5 / 14.0 |
|                   | SA (n=1022)                  | 44.8 / 12.2                   | 55.3 / 7.4  | 37.0 / 15.4 | 47.2 / 9.5  |
|                   | Referral/Uni (n=79)          | 49.4 / 12.7                   | 62.0 / 10.1 | 46.8 / 11.4 | 63.8 / 7.5  |

|                  |                       |             |            |             |             |
|------------------|-----------------------|-------------|------------|-------------|-------------|
| Practice type II | Charity (n=35)        | 31.4 / 11.4 | 48.6 / 5.7 | 31.4 / 17.1 | 33.3 / 15.2 |
|                  | Private (n=1015)      | 44.0 / 12.2 | 54.0 / 7.7 | 35.8 / 16.1 | 46.0 / 9.7  |
| % insured        | >20% insured (n=130)  | 48.5 / 9.0  | 61.2 / 9.7 | 38.6 / 16.7 | 50.0 / 8.5  |
|                  | <20% insured (n=1042) | 43.4 / 12.4 | 53.6 / 7.4 | 36.4 / 15.8 | 46.6 / 9.9  |

Cont. Europe – Continental Europe; SA – 100% small animal practice; Uni – university hospital

**Table 3.** Univariate analysis of euthanasia related questions. Grey shading indicates statistical significance.

D3/C3: “Typically, in this practice, out of 10 dogs/cats newly diagnosed with diabetes and started on insulin injections, in how many is insulin treatment subsequently stopped within 1 month because of lack of success or compliance? “

D4/C4: “Typically, in this practice, out of 10 dogs/cats newly diagnosed with diabetes and started on insulin injections, in how many is insulin treatment subsequently stopped within 1 year because of lack of success or compliance?”

| Variable          | Group (n=number respondents) | Median [IQ range] |           |         |         | P-value |       |       |       |
|-------------------|------------------------------|-------------------|-----------|---------|---------|---------|-------|-------|-------|
|                   |                              | D 3               | D 4       | C 3     | C 4     | D3      | D 4   | C 3   | C 4   |
| Country           | UK & Ireland (n=168)         | 0 [0-1]           | 0.5 [0-1] | 0 [0-1] | 1 [0-2] | 0.249   | 0.055 | 0.084 | 0.393 |
|                   | USA (n=790)                  | 0 [0-1]           | 1 [0-2]   | 1 [0-1] | 1 [0-1] |         |       |       |       |
|                   | Canada (n=92)                | 0 [0-1]           | 1 [0-2]   | 0 [0-1] | 1 [0-2] |         |       |       |       |
|                   | Australia (n=27)             | 0 [0-1]           | 1 [0-2]   | 0 [0-1] | 1 [0-2] |         |       |       |       |
|                   | Cont. Europe (n=90)          | 0 [0-1]           | 1 [0-2]   | 0 [0-2] | 1 [0-2] |         |       |       |       |
| Practice location | Rural (n=156)                | 0 [0-1]           | 1 [0-2]   | 0 [0-1] | 1 [0-2] | 0.032   | 0.052 | 0.608 | 0.381 |
|                   | Urban (n=363)                | 0 [0-1]           | 1 [0-1]   | 0 [0-1] | 1 [0-2] |         |       |       |       |
|                   | Suburban (n=637)             | 0 [0-1]           | 1 [0-2]   | 0 [0-1] | 1 [0-2] |         |       |       |       |
| Practice type I   | Mixed (n=114)                | 0 [0-1]           | 1 [0-2]   | 0 [0-1] | 1 [0-2] | 0.015   | 0.001 | 0.046 | 0.014 |
|                   | SA (n=1022)                  | 0 [0-1]           | 1 [0-2]   | 0 [0-1] | 1 [0-2] |         |       |       |       |
| Practice type II  | Referral/Uni (n=79)          | 0 [0-1]           | 1 [0-2]   | 0 [0-1] | 1 [0-2] | 0.010   | 0.172 | 0.082 | 0.156 |
|                   | Charity (n=35)               | 1 [0-1]           | 1 [0-2]   | 1 [0-1] | 1 [1-2] |         |       |       |       |
|                   | Private (n=1015)             | 0 [0-1]           | 1 [0-2]   | 0 [0-1] | 1 [0-2] |         |       |       |       |
| % insured         | >20% insured (n=130)         | 0 [0-1]           | 0 [0-1]   | 0 [0-1] | 1 [0-2] | 0.335   | 0.002 | 0.980 | 0.119 |
|                   | <20% insured (n=1042)        | 0 [0-1]           | 1 [0-2]   | 0 [0-1] | 1 [0-2] |         |       |       |       |

IQR – interquartile range; Cont. Europe – Continental Europe; SA – 100% small animal practice; Uni – university hospital; <sup>a</sup> Kruskal-Wallis Test
