# Supplementary material for: The Big Pet Diabetes Survey: Perceived Frequency and Triggers for Euthanasia
Source: MDPI journal article supplement (doi:10.3390/vetsci4020027), 2017-05-14
Supplement: s1 [file s1]

## **Supplementary 1. The Big Pet Diabetes Survey**

### **Introduction**

#### **Questionnaire for veterinarians involved in the treatment of dogs and cats with diabetes**

##### **Short-term aim:**

To gain information on the perceived benefits and shortcomings of insulin treatment in veterinary practices.

##### **Long-term aim:**

To use this information to develop superior diabetic treatment and improve the quality of life of diabetic pets and their owners.

##### **Instructions:**

Filling in the questionnaire should not take longer than 5-10 minutes of your time. Please note that **only one** VET questionnaire should be submitted per practice/ practice branch. Please pay close attention to words that specify the statement or question (i.e ..... in the **cat**, ..... in the **dog**). Please, feel free to provide additional comments at the end of the questionnaire.

**Many thanks for your cooperation! With your help we hope to improve the welfare of our diabetic patients.**

## General Practice Questions

1. What country do you practice in?

- ☐ UK
- ☐ USA
- ☐ Australia
- ☐ Austria
- ☐ Belgium
- ☐ Canada
- ☐ Denmark
- ☐ Belgium
- ☐ Finland
- ☐ France
- ☐ Germany
- ☐ Greece
- ☐ Hungary
- ☐ Italy
- ☐ Ireland
- ☐ Luxembourg
- ☐ Netherlands
- ☐ Norway
- ☐ Poland
- ☐ Portugal
- ☐ Spain
- ☐ Sweden
- ☐ Switzerland
- ☐ Other

*If you selected Other, please give details here:*

2. My practice is located in a location best described as:

- ☐ Rural
- ☐ Urban
- ☐ Suburban
- ☐ Other

*If you selected Other, please give details:*

3. My practice is:

- ☐ 100% small animals
- ☐ Mixed
- ☐ Other

*If you selected Other, please give details:*

4. Typically, in this practice, how many cats and dogs are insured?

|      | 1-<br>10% | 11-<br>20% | 21-<br>30% | 31-<br>40% | 41-<br>50% | 51-<br>60% | 61-<br>70% | 71-<br>80% | 81-<br>90% | 91-<br>100% | Not<br>Applicable |
|------|-----------|------------|------------|------------|------------|------------|------------|------------|------------|-------------|-------------------|
| Dogs |           |            |            |            |            |            |            |            |            |             |                   |
| Cats |           |            |            |            |            |            |            |            |            |             |                   |

5. My practice is a:

- ☐ Private practice
- ☐ Charity
- ☐ Charity and private practice
- ☐ First line university practice
- ☐ Small animal referral practice
- ☐ First line and small animal referral practice
- ☐ Other

*If you selected Other, please give details:*

#### Diabetic Treatment Questions (5-10 minutes)

1. Please estimate the number of **cats** newly diagnosed with diabetes mellitus in your practice per year: ☐ 0 ☐ 1 ☐ 2 ☐ 3 ☐ 4 ☐ 5 ☐ 6 ☐ 7 ☐ 8 ☐ 9 ☐ 10 ☐ More than 10
  
2. Please estimate the number of **dogs** newly diagnosed with diabetes mellitus in your practice per year: ☐ 0 ☐ 1 ☐ 2 ☐ 3 ☐ 4 ☐ 5 ☐ 6 ☐ 7 ☐ 8 ☐ 9 ☐ 10 ☐ More than 10
  
3. Typically, in this practice, out of 10 **cats** newly diagnosed with diabetes mellitus how many are started on a new diet at time of diagnosis?  
☐ 0 ☐ 1 ☐ 2 ☐ 3 ☐ 4 ☐ 5 ☐ 6 ☐ 7 ☐ 8 ☐ 9 ☐ 10
  
4. Typically, in this practice, out of 10 **dogs** newly diagnosed with diabetes mellitus how many are started on a new diet at time of diagnosis?  
☐ 0 ☐ 1 ☐ 2 ☐ 3 ☐ 4 ☐ 5 ☐ 6 ☐ 7 ☐ 8 ☐ 9 ☐ 10
  
5. Typically, in this practice, out of 10 **cats** newly diagnosed with diabetes mellitus how many are started on oral hypoglycaemics (eg glipizide, acarbose) at time of diagnosis? ☐ 0 ☐ 1 ☐ 2 ☐ 3 ☐ 4 ☐ 5 ☐ 6 ☐ 7 ☐ 8 ☐ 9 ☐ 10

6. Typically, in this practice, out of 10 **dogs** newly diagnosed with diabetes mellitus how many are started on oral hypoglycaemics (eg glipizide, acarbose) at time of diagnosis? ☐ 0 ☐ 1 ☐ 2 ☐ 3 ☐ 4 ☐ 5 ☐ 6 ☐ 7 ☐ 8 ☐ 9 ☐ 10
7. Typically, in this practice, out of 10 **cats** newly diagnosed with diabetes mellitus how many are started on subcutaneous insulin injections at time of diagnosis? ☐ 0 ☐ 1 ☐ 2 ☐ 3 ☐ 4 ☐ 5 ☐ 6 ☐ 7 ☐ 8 ☐ 9 ☐ 10
8. Typically, in this practice, out of 10 **dogs** newly diagnosed with diabetes mellitus how many are started on subcutaneous insulin injections at time of diagnosis? ☐ 0 ☐ 1 ☐ 2 ☐ 3 ☐ 4 ☐ 5 ☐ 6 ☐ 7 ☐ 8 ☐ 9 ☐ 10
9. Typically, in this practice, out of 10 **cats** newly diagnosed with diabetes mellitus how many are euthanased on request of the owner at time of diagnosis?  
☐ 0 ☐ 1 ☐ 2 ☐ 3 ☐ 4 ☐ 5 ☐ 6 ☐ 7 ☐ 8 ☐ 9 ☐ 10
10. Typically, in this practice, out of 10 **dogs** newly diagnosed with diabetes mellitus how many are euthanased on request of the owner at time of diagnosis?  
☐ 0 ☐ 1 ☐ 2 ☐ 3 ☐ 4 ☐ 5 ☐ 6 ☐ 7 ☐ 8 ☐ 9 ☐ 10
11. Typically, in this practice, out of 10 **cats** newly diagnosed with diabetes mellitus how many are euthanased on request of the owner **because of not wanting to treat with insulin injections at time of diagnosis**? ☐ 0 ☐ 1 ☐ 2 ☐ 3 ☐ 4 ☐ 5 ☐ 6 ☐ 7 ☐ 8 ☐ 9 ☐ 10
12. Typically, in this practice, out of 10 **dogs** newly diagnosed with diabetes mellitus how many are euthanased on request of the owner **because of not wanting to treat with insulin injections at time of diagnosis**? ☐ 0 ☐ 1 ☐ 2 ☐ 3 ☐ 4 ☐ 5 ☐ 6 ☐ 7 ☐ 8 ☐ 9 ☐ 10

**13.** According to you, how much are **owners** of diabetic animals concerned by the following issues:

|                                               | No concern | Little concern | Moderate concern | Great concern | Not Applicable |
|-----------------------------------------------|------------|----------------|------------------|---------------|----------------|
| Hypoglycaemia                                 |            |                |                  |               |                |
| Diabetic ketoacidosis                         |            |                |                  |               |                |
| Having to inject their animal                 |            |                |                  |               |                |
| Costs of treatment                            |            |                |                  |               |                |
| Quality of life of the animal                 |            |                |                  |               |                |
| Life style changes that the owner has to make |            |                |                  |               |                |

*Any other concerns we might have forgotten?*

|  |
|--|
|  |
|--|

**14.** How much do the following issues worry **you as a vet**:

|                                                               | No concern | Little concern | Moderate concern | Great concern | Not Applicable |
|---------------------------------------------------------------|------------|----------------|------------------|---------------|----------------|
| Hypoglycaemia                                                 |            |                |                  |               |                |
| Diabetic ketoacidosis                                         |            |                |                  |               |                |
| Costs of treatment                                            |            |                |                  |               |                |
| Quality of life of the animal                                 |            |                |                  |               |                |
| Difficulties in obtaining rapid and adequate control          |            |                |                  |               |                |
| Difficulties of getting the owner on board with the treatment |            |                |                  |               |                |

*Any other concerns we might have forgotten?*

|  |
|--|
|  |
|--|

- 15.** If diabetic animals are euthanased/ treatment is stopped/ not started, how important are the following factors:

|                                       | Not important | Of little importance | Moderate importance | Great importance | Not Applicable |
|---------------------------------------|---------------|----------------------|---------------------|------------------|----------------|
| Costs                                 |               |                      |                     |                  |                |
| Welfare of pet                        |               |                      |                     |                  |                |
| Too much impact on lifestyle of owner |               |                      |                     |                  |                |
| Injection problems                    |               |                      |                     |                  |                |
| Problems obtaining adequate control   |               |                      |                     |                  |                |
| Concurrent disease                    |               |                      |                     |                  |                |
| Age of the animal                     |               |                      |                     |                  |                |
| Other                                 |               |                      |                     |                  |                |

*If you identified another factor, please give details:*

|  |
|--|
|  |
|--|

- 16.** Typically, in this practice, out of 10 **cats** newly diagnosed with diabetes mellitus and started on insulin injections, in how many is insulin treatment subsequently stopped within 1 **month** because of lack of success or compliance?  
☐ 0 ☐ 1 ☐ 2 ☐ 3 ☐ 4 ☐ 5 ☐ 6 ☐ 7 ☐ 8 ☐ 9 ☐ 10
- 17.** Typically, in this practice, out of 10 **cats** newly diagnosed with diabetes mellitus and started on insulin injections, in how many is insulin treatment subsequently stopped within 1 **year** because of lack of success or compliance?  
☐ 0 ☐ 1 ☐ 2 ☐ 3 ☐ 4 ☐ 5 ☐ 6 ☐ 7 ☐ 8 ☐ 9 ☐ 10
- 18.** Typically, in this practice, out of 10 **dogs** newly diagnosed with diabetes mellitus and started on insulin injections, in how many is insulin treatment subsequently stopped within 1 **month** because of lack of success or compliance?  
☐ 0 ☐ 1 ☐ 2 ☐ 3 ☐ 4 ☐ 5 ☐ 6 ☐ 7 ☐ 8 ☐ 9 ☐ 10

19. Typically, in this practice, out of 10 **dogs** newly diagnosed with diabetes mellitus and started on insulin injections, in how many is insulin treatment subsequently stopped within 1 **year** because of lack of success or compliance?  
☐ 0 ☐ 1 ☐ 2 ☐ 3 ☐ 4 ☐ 5 ☐ 6 ☐ 7 ☐ 8 ☐ 9 ☐ 10
20. Typically, in this practice, out of 10 **cats** newly diagnosed with diabetes mellitus, how many achieve a satisfactory quality of life according **to the owner** once treatment with insulin injections has been started? ☐ 0 ☐ 1 ☐ 2 ☐ 3 ☐ 4 ☐ 5 ☐ 6 ☐ 7 ☐ 8 ☐ 9 ☐ 10 ☐ Don't know
21. Typically, in this practice, out of 10 **dogs** newly diagnosed with diabetes mellitus, how many achieve a satisfactory quality of life according **to the owner** once treatment with insulin injections has been started? ☐ 0 ☐ 1 ☐ 2 ☐ 3 ☐ 4 ☐ 5 ☐ 6 ☐ 7 ☐ 8 ☐ 9 ☐ 10 ☐ Don't know
22. Typically, in this practice, out of 10 owners with **cats** newly diagnosed with diabetes mellitus, how many of **the owners** eventually have a satisfactory quality of life and not feel limited in lifestyle because of daily insulin injections?  
☐ 0 ☐ 1 ☐ 2 ☐ 3 ☐ 4 ☐ 5 ☐ 6 ☐ 7 ☐ 8 ☐ 9 ☐ 10 ☐ Don't know
23. Typically, in this practice, out of 10 owners with **dogs** newly diagnosed with diabetes mellitus, how many of **the owners** eventually have a satisfactory quality of life and not feel limited in lifestyle because of daily insulin injections?  
☐ 0 ☐ 1 ☐ 2 ☐ 3 ☐ 4 ☐ 5 ☐ 6 ☐ 7 ☐ 8 ☐ 9 ☐ 10 ☐ Don't know
24. Typically, in this practice, out of 10 **cats** newly diagnosed with diabetes mellitus, how many suffer from an apparent hypoglycaemic crisis (suggestive clinical signs OR recorded blood glucose) at some stage during treatment?  
☐ 0 ☐ 1 ☐ 2 ☐ 3 ☐ 4 ☐ 5 ☐ 6 ☐ 7 ☐ 8 ☐ 9 ☐ 10
25. Typically, in this practice, out of 10 **dogs** newly diagnosed with diabetes mellitus, how many suffer from an apparent hypoglycaemic crisis (suggestive clinical signs OR recorded blood glucose) at some stage during treatment?  
☐ 0 ☐ 1 ☐ 2 ☐ 3 ☐ 4 ☐ 5 ☐ 6 ☐ 7 ☐ 8 ☐ 9 ☐ 10
26. In your experience, out of 10 diabetic **cats** seen in your practice how many will suffer from an episode of keto-acidosis (DKA) **after** insulin treatment has been initiated? ☐ 0 ☐ 1 ☐ 2 ☐ 3 ☐ 4 ☐ 5 ☐ 6 ☐ 7 ☐ 8 ☐ 9 ☐ 10



**27.** In your experience, out of 10 diabetic **dogs** seen in your practice how many will suffer from an episode of keto-acidosis (DKA) **after** insulin treatment has been initiated? ☐ 0 ☐ 1 ☐ 2 ☐ 3 ☐ 4 ☐ 5 ☐ 6 ☐ 7 ☐ 8 ☐ 9 ☐ 10

**28.** Are owners more likely to opt for insulin injections under the following circumstances?

|                                                            | Definitely not | Maybe | Probably | Definitely yes | Don't know |
|------------------------------------------------------------|----------------|-------|----------|----------------|------------|
| When the animal is insured                                 |                |       |          |                |            |
| If they themselves or close family or friends are diabetic |                |       |          |                |            |

**29.** Do you tend to start once daily (SID) or twice daily (BID) insulin injections when starting insulin treatment in a cat?

- ☐ SID  
☐ BID

**30.** Do you tend to start once daily (SID) or twice daily (BID) insulin injections when starting insulin treatment in a dog?

- ☐ SID  
☐ BID

**31.** Typically, in this practice, out of 10 owners with animals newly diagnosed with diabetes mellitus, how many of **the owners** report having difficulties fitting in a twice daily injection treatment instead of a once daily injection treatment?

- ☐ 0 ☐ 1 ☐ 2 ☐ 3 ☐ 4 ☐ 5 ☐ 6 ☐ 7 ☐ 8 ☐ 9 ☐ 10

**32.** According to you how important are the following compliance issues encountered in your practice?

|                                            | Not important | Of little importance | Moderate importance | Great importance |
|--------------------------------------------|---------------|----------------------|---------------------|------------------|
| <b>Owner</b> having injection difficulties |               |                      |                     |                  |
| <b>Cat</b> causing injection difficulties  |               |                      |                     |                  |
| <b>Dog</b> causing injection difficulties  |               |                      |                     |                  |
| Inappropriate insulin storage              |               |                      |                     |                  |
| Injections not given at right times        |               |                      |                     |                  |
| Owner does not stick to feeding protocol   |               |                      |                     |                  |
| Other                                      |               |                      |                     |                  |

*If you identified another factor, please give details:*

|  |
|--|
|  |
|--|

**33.** Would you treat your own **cat** with daily insulin injections if diagnosed with diabetes?

- ☐ Definitely not 0
- ☐ Maybe 1
- ☐ Probably 2
- ☐ Definitely yes 3
- ☐ Don't know 4

**34.** Would you treat your own **dog** with daily insulin injections if diagnosed with diabetes?

- ☐ Definitely not
- ☐ Maybe
- ☐ Probably
- ☐ Definitely yes
- ☐ Don't know

**35.** What is your approximate starting insulin dose per kilogram in **cats**?

**36.** What is your approximate starting insulin dose per kilogram in **dogs**?

**37.** Any comments you would like to make on any of the discussed topics?
